# Supplementary material for: Electrochemical properties of SnO2 nanoparticles immobilized within a metal–organic framework as an anode material for lithium-ion batteries
Source: Royal Society of Chemistry journal article supplement (doi:10.1039/c5ra16587c), 2015-01-01
Supplement: c5ra16587c1.pdf [file c5ra16587c1.pdf]

# Electrochemical properties of SnO<sub>2</sub> nanoparticles immobilized within a metal-organic framework as anode material for lithium-ion battery

Buxue Wang, Ziqi Wang, <sup>a</sup> Yuanjing Cui,\* Yu Yang, Zhiyu Wang and Guodong Qian\*

State Key Laboratory of Silicon Materials, Cyrus Tang Center for Sensor Materials and Applications, School of Materials Science and Engineering, Zhejiang University, Hangzhou 310027 P. R. China. E-mail: cuiyj@zjuedu.cn, gdqian@zju.edu.cn.

## Experimental Details

### Synthesis

1. MIL-101(Cr). A mixture of 1.86 g CrCl<sub>3</sub>·6H<sub>2</sub>O, 1.16 g terephthalic acid (BDC), 50 ml H<sub>2</sub>O was loaded into a 100 ml autoclave with a Teflon cup and heated at 210 °C for 24 h. Upon cooling down, the green suspension of nano MIL-101(Cr) was centrifuged and washed with hot DMF and EtOH. Then it was dispersed in NaOH solution (pH=12, 20 ml) and stirred overnight at 60 °C. After it was centrifuged and washed with deionized water, MIL-101(Cr) was obtained by drying at 120 °C in vacuum.
2. SnO<sub>2</sub>@MIL-101(Cr). 0.2 g MIL-101(Cr) and 1.0 g SnCl<sub>4</sub>·5H<sub>2</sub>O were dispersed in 15 ml H<sub>2</sub>O and stirred for 24 h in room temperature. Then it was centrifuged and washed once with 10 ml H<sub>2</sub>O. After that it was dispersed in 100 ml NaOH solution (pH=12) and stirred over night at room temperature. Then the suspension was centrifuged and washed with deionized water (four times, 20 ml each time) to remove free ions in MIL-101(Cr). After drying at 180 °C in vacuum, SnO<sub>2</sub>@MIL-101(Cr) was obtained. Bare SnO<sub>2</sub> was synthesized following the similar procedure in the absence of MIL-101(Cr) by adding NaOH solution into SnCl<sub>4</sub> solution.
3. Battery assembling. SnO<sub>2</sub>@MIL-101(Cr) (bare SnO<sub>2</sub>) was mixed with 10% acetylene black and 10% polyvinylidene fluoride (PVDF) in N-methyl pyrrolidone (NMP) separately. The slurry was coated on copper foil as anode (~0.3 mg-SnO<sub>2</sub>/cm<sup>2</sup>, whole carbon content 41.6 wt%). 2025 batteries were assembled with electrolyte of 1 M LiPF<sub>6</sub> in 1,3-dioxolan-2-one/dimethylcarbonate (EC/DMC, v:v=1:1), Celgard 2400 membrane and lithium foil counter electrode.

### Characterization

PXRD patterns were recorded on a PANalytical X'Pert PRO diffractometer at 40 kV, 25 mA for Cu Kα, (λ=1.541 Å). SEM morphologies were investigated using a Hitachi S4800 field-emission scanning electron microscopy. TEM morphologies and EDS mappings were taken on a Hitachi HT7700 transmission electron microscopy. ICP-MS was performed on a Thermo Scientific XSERIES 2 ICP-MS system to determine SnO<sub>2</sub> content in SnO<sub>2</sub>@MIL-101(Cr). The FTIR spectra were measured with a Nicolet Thermo Scientific Nicolet iS10 spectrometer. N<sub>2</sub> sorption properties were studied with a Quantachrome 20-E high speed gas sorption analyzer. The CV curves were collected with an Arbin electrochemical workstation at a scan rate of 0.1 mV s<sup>-1</sup> between 0.02 and 2.5 V. The EIS data were collected with an Arbin electrochemical workstation. The charge/discharge profiles, cyclability, ratecapability and Coulombic efficiency were recorded with

a LAND battery cyclers between 0.02 and 2.5 V.

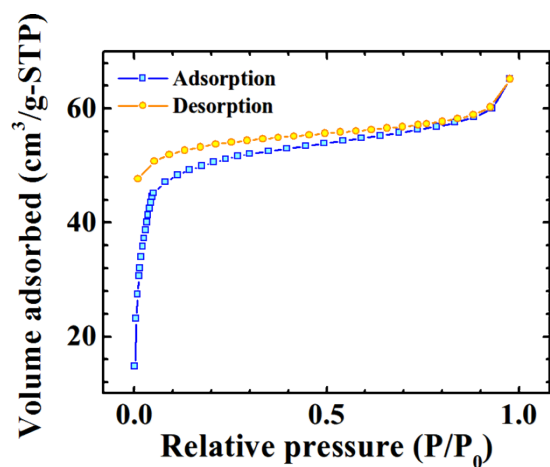

**Fig. S1.** N<sub>2</sub> adsorption/desorption isotherm of SnO<sub>2</sub>@MIL-101(Cr) at 77 K.

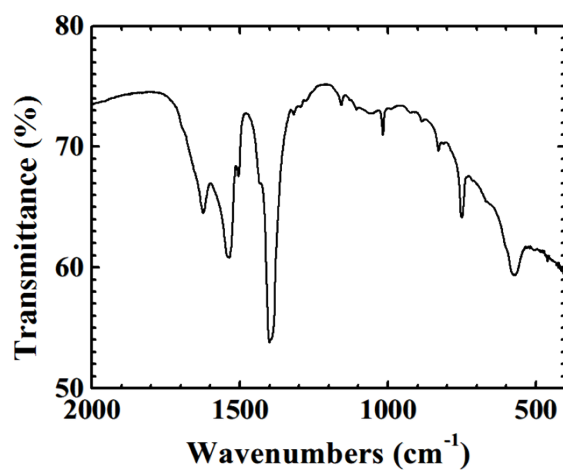

**Fig. S2.** FTIR spectra of SnO<sub>2</sub>@MIL-101(Cr).

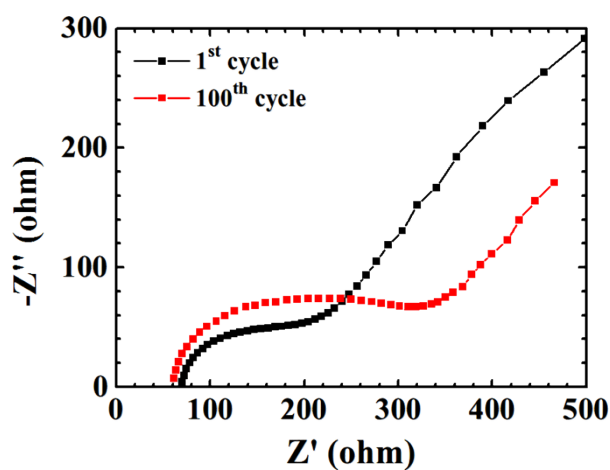

**Fig. S3.** EIS spectra for the half cell with SnO<sub>2</sub>@MIL-101(Cr) anode after 1<sup>st</sup> cycle and 100<sup>th</sup> cycle.

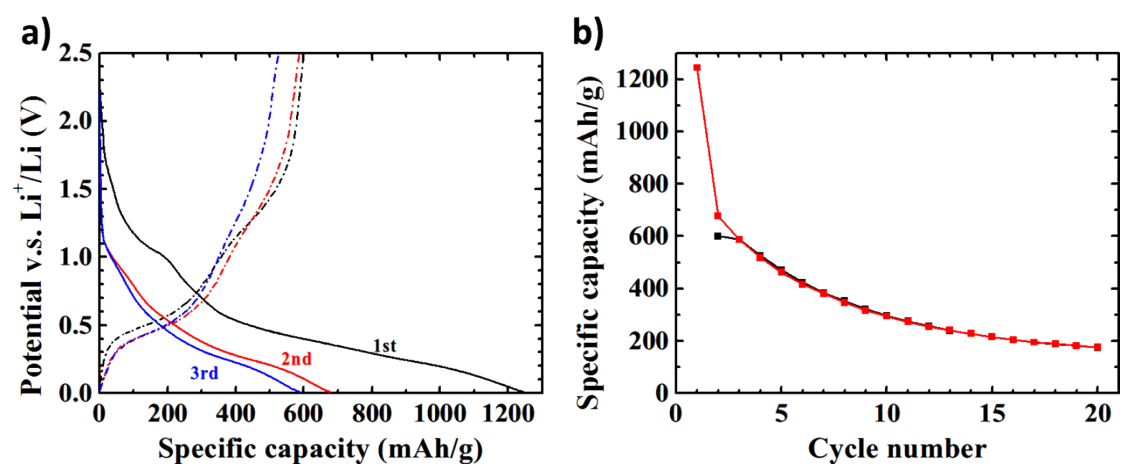

**Fig. S4.** (a) Galvanostatic charge/discharge profiles and (b) cycle performance at 0.1 C of bare SnO<sub>2</sub>.
